# Supplementary material
Source: publisher figshare collection journal article supplement (https://gsajournals.figshare.com/ndownloader/files/27382559)
Supplement: Supplementary file 1 [file 27382559]

EP = 300 V, 10 ms, *gfp*-dsRNA (1  $\mu$ g/ $\mu$ L)

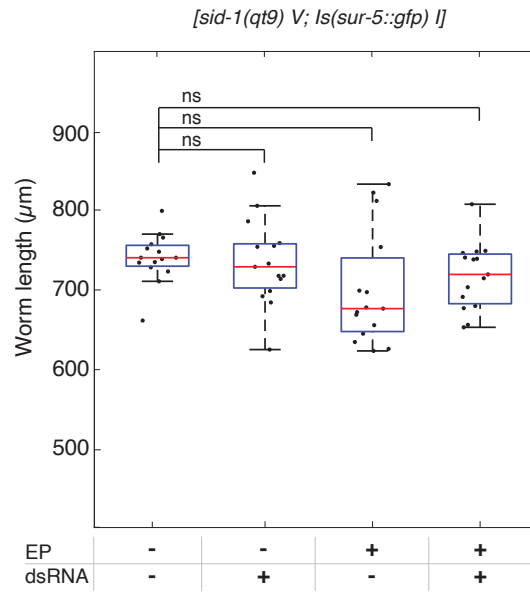

**Figure S2.** Body lengths of BIG0106 worms electroporated and compared to controls.

Body lengths of **L1** stage BIG0106 *[sid-1(qt9) III; ls(sur-5::gfp) I]* worms, electroporated at 300 V 10 ms. Body lengths were measured 48 hours after electroporation and compared to control worms including untreated animals (electroporation (-)/dsRNA (-)), electroporated animals without dsRNA (electroporation (+)/dsRNA (-)) and animals incubated with dsRNA (electroporation (-)/dsRNA (+)) (ANOVA test with Bonferroni correction).
